# Supplementary material
Source: PubMed Central journal article supplement (PMC2950745)

Figure S1.

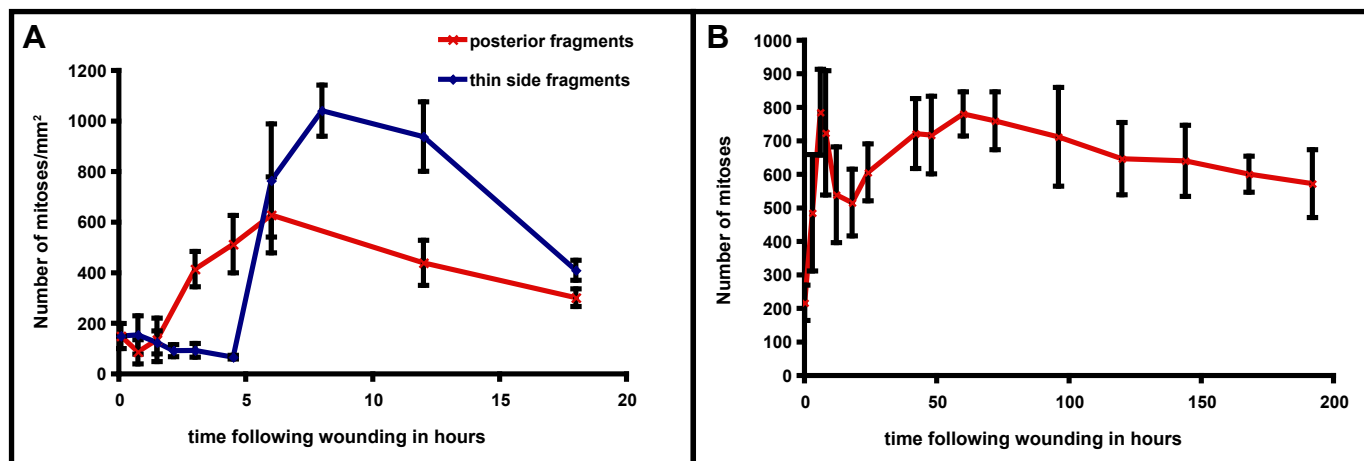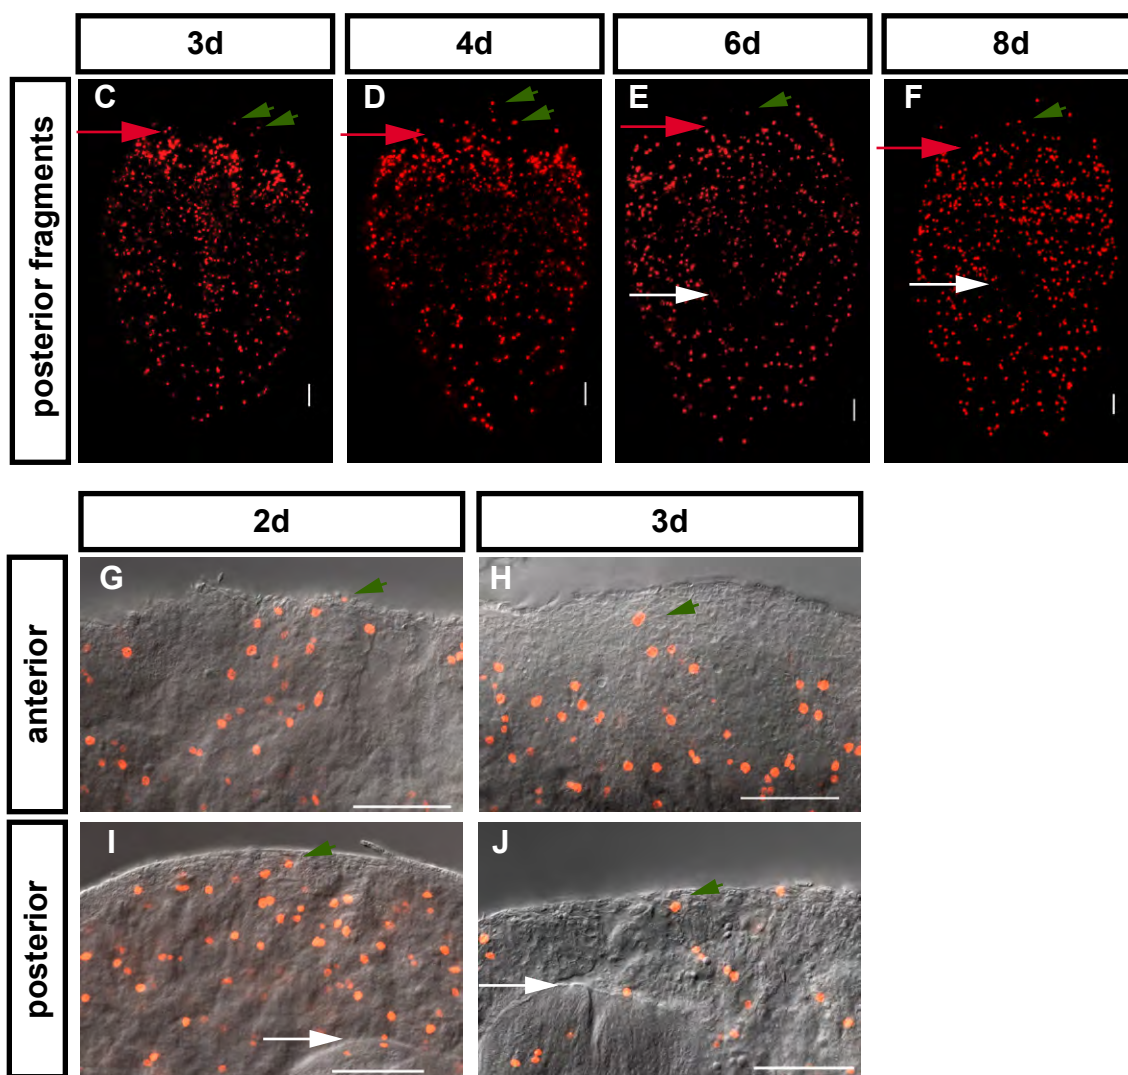

Figure S2.

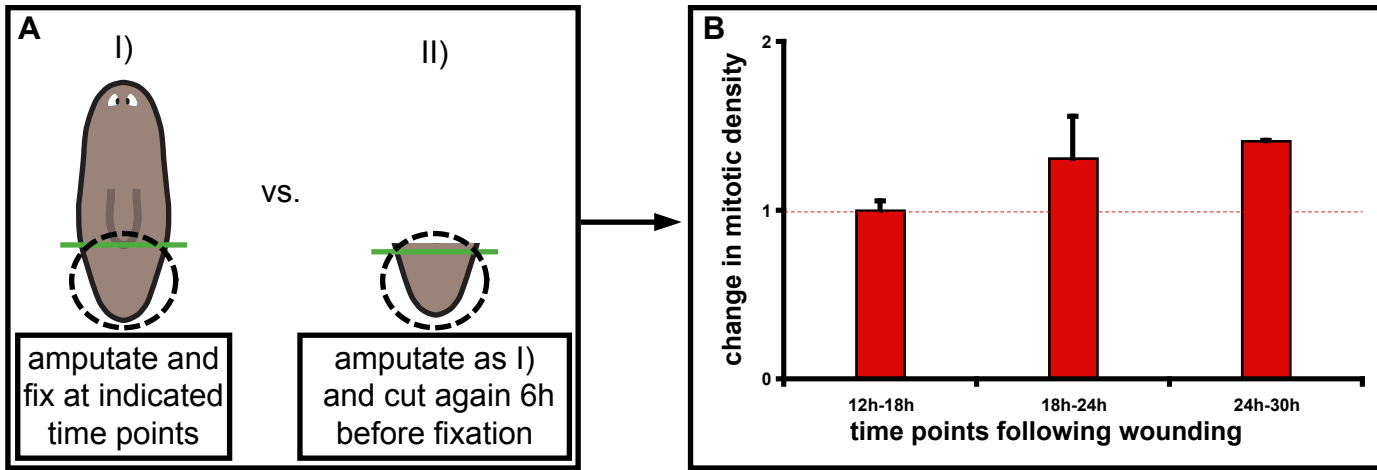

Figure S3.

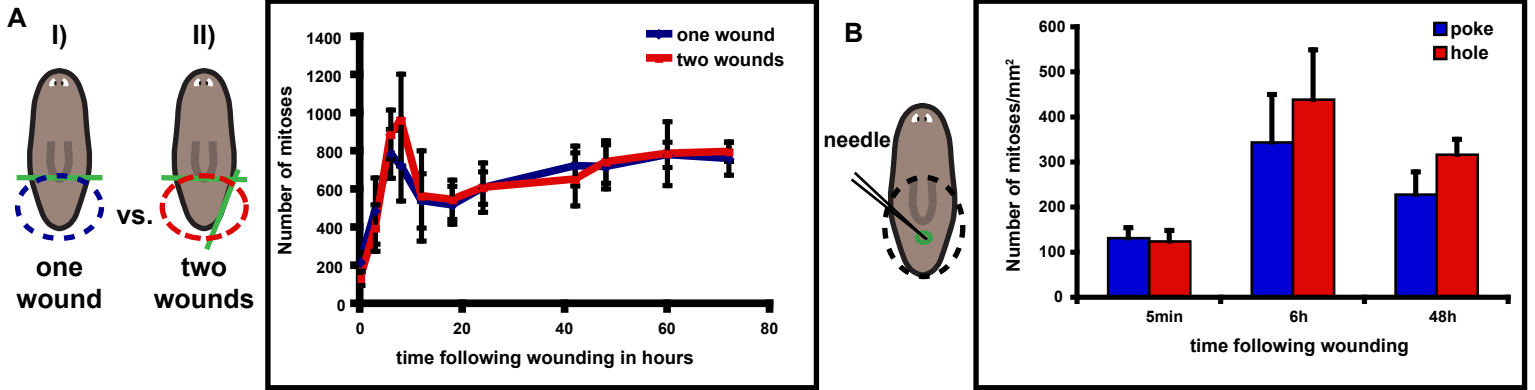

Figure S4.

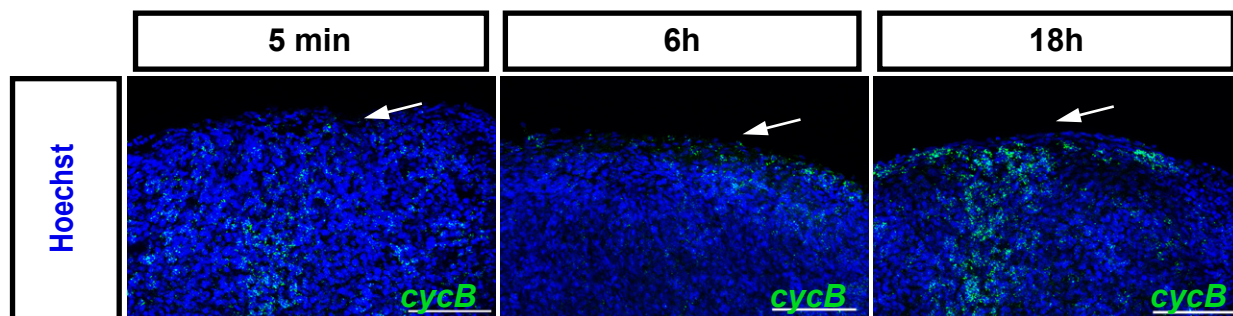

**Figure S5.**

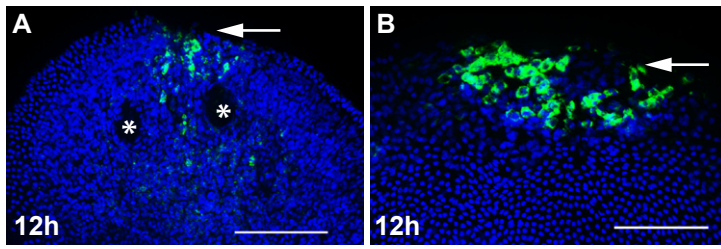

Figure S6.

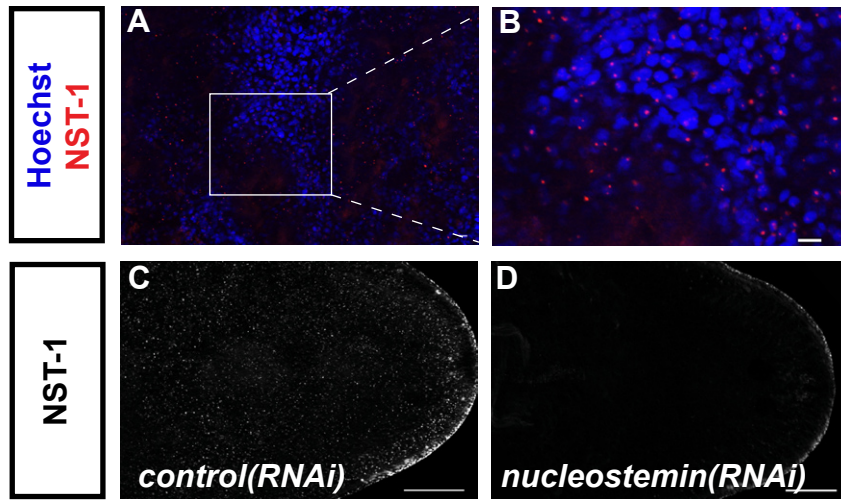

Figure S7.

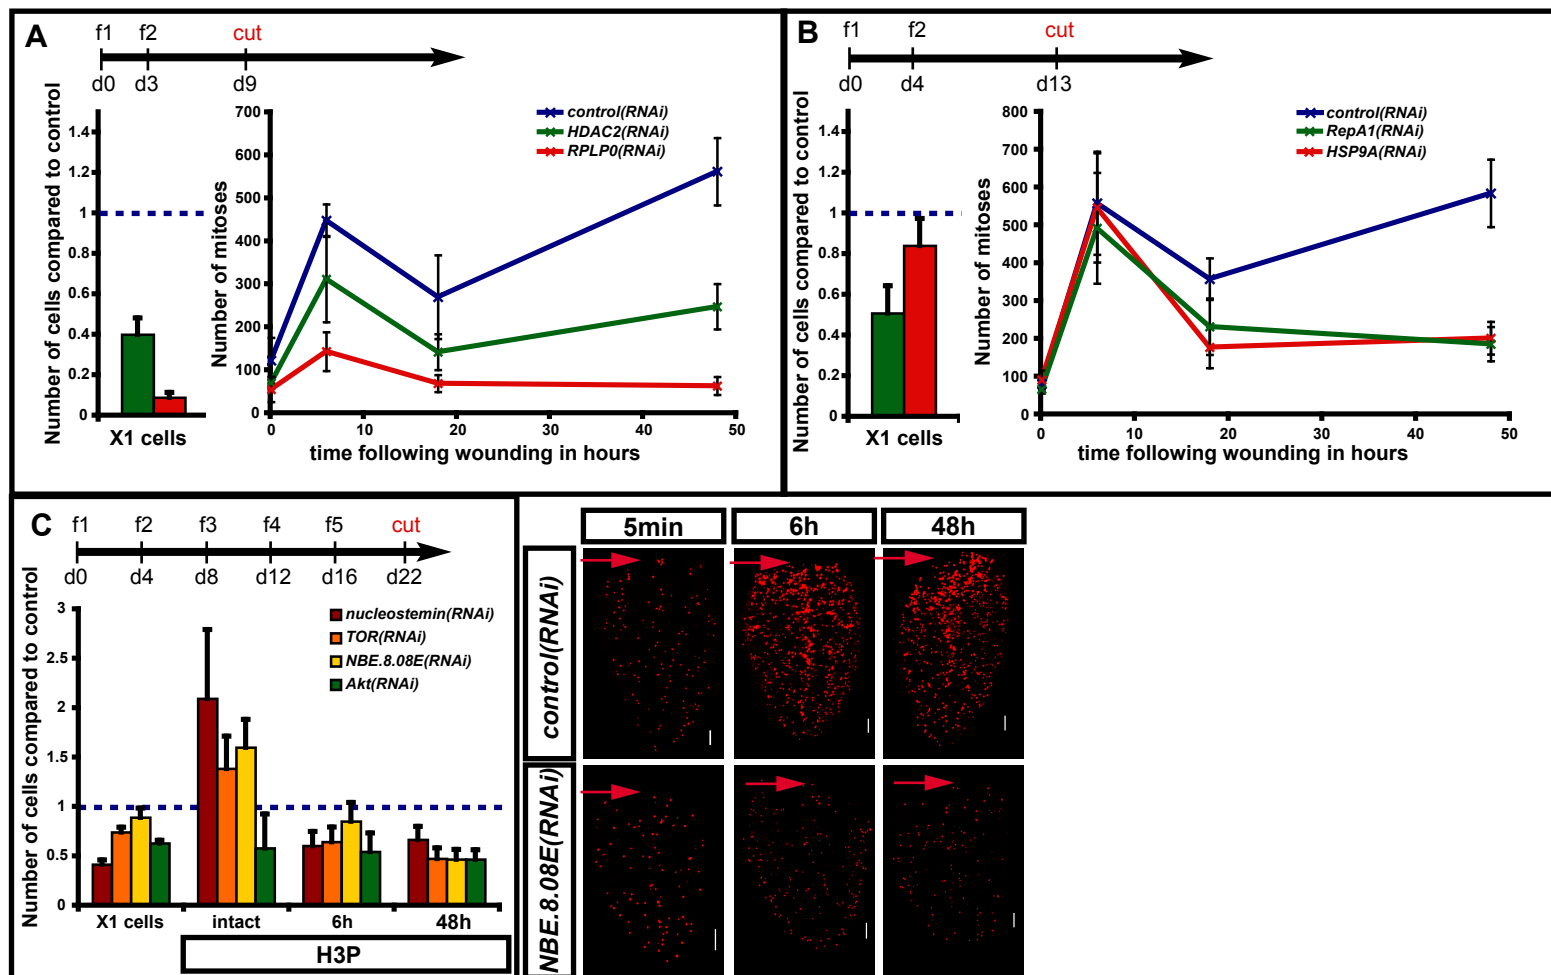

Supplement: NIHMS229080-supplement-01.pdf [file NIHMS229080-supplement-01.pdf]
